# Supplementary material for: A gas-to-particle conversion mechanism helps to explain atmospheric particle formation through clustering of iodine oxides
Source: PubMed Central journal article supplement (PMC7481236; doi:10.1038/s41467-020-18252-8), 2020-09-09
Supplement: 41467_2020_18252_MOESM3_ESM.pdf [file 41467_2020_18252_MOESM3_ESM.pdf]

## Description of Additional Supplementary Files

**File Name:** Supplementary Movie 1

**Description:** Laboratory observation of iodine smoke produced by broad band photolysis of I<sub>2</sub> in the presence of O<sub>3</sub>, with no water added. The lamp visible light scattered by the smoke particles is observed through a view port situated the side of the flow tube.

**File Name:** Supplementary Movie 2

**Description:** Born-Oppenheimer Molecular Dynamics (BOMD) simulations. The water droplet system contained 191 water molecules and one I<sub>2</sub>O<sub>2</sub> molecule and was simulated for 50 picoseconds.

**File Name:** Supplementary Movie 3

**Description:** As Supplementary Movie 2 for I<sub>2</sub>O<sub>3</sub> and 80 picoseconds simulation time.

**File Name:** Supplementary Movie 4

**Description:** As Supplementary Movie 3 for I<sub>2</sub>O<sub>4</sub> and 33 picoseconds simulation time.
